# Supplementary material
Source: MDPI journal article supplement (https://www.mdpi.com/2227-9040/7/2/19)

# Electronic Supplementary Information

for

## **An Organophosphorus(III)-Selective Chemodosimeter for the Ratiometric Electrochemical Detection of Phosphines**

S. A. Spring,<sup>a</sup> S. Goggins,<sup>a\*</sup> and C. G. Frost<sup>a</sup>

Department of Chemistry, University of Bath, Bath, BA2 7AY, UK

\*Corresponding author. s.goggins@bath.ac.uk

## Content

|                                                                                                                      |    |
|----------------------------------------------------------------------------------------------------------------------|----|
| General information: .....                                                                                           | 3  |
| Scheme S1 – Synthetic route to probe 1 .....                                                                         | 4  |
| 4-azidobenzyl alcohol 6 .....                                                                                        | 4  |
| Ferrocenyl azide 7 .....                                                                                             | 4  |
| 4-azidobenzyl (ferrocenyl)carbamate 1 .....                                                                          | 4  |
| Aminoferrocene 4 .....                                                                                               | 5  |
| Solution Stability of Probe 1 .....                                                                                  | 6  |
| Assay Optimization.....                                                                                              | 7  |
| Method for the desktop electrochemical detection of organophosphorus(III)<br>compounds (optimized conditions).....   | 7  |
| Phosphine Scope .....                                                                                                | 8  |
| Kinetic Linear Transformation of Probe 1 .....                                                                       | 8  |
| Kinetic Calculations.....                                                                                            | 8  |
| Complex Sample Testing.....                                                                                          | 9  |
| Complex Sample Preparation .....                                                                                     | 9  |
| Handheld Potentiostat .....                                                                                          | 10 |
| Handheld Setup .....                                                                                                 | 10 |
| Method for the handheld electrochemical detection of organophosphorus(III)<br>compounds (optimised conditions) ..... | 10 |
| Calibration Curve.....                                                                                               | 10 |
| Triphenylphosphine assay using Handheld Potentiostat.....                                                            | 11 |
| Comparative assays for Handheld vs Desktop Electrochemical Analysis.....                                             | 12 |
| NMR .....                                                                                                            | 13 |

### General information:

Proton and carbon nuclear magnetic resonance (NMR) spectra were recorded on an Agilent Technologies 500 MHz spectrometer ( $^1\text{H}$  NMR at 500 MHz and  $^{13}\text{C}$  NMR at 126 MHz). Chemical shifts for protons are reported in parts per million downfield from tetramethylsilane and are referenced to residual protium in the solvent ( $^1\text{H}$  NMR:  $\text{CHCl}_3$  at 7.26 ppm, and  $\text{C}_6\text{H}_6$  at 7.16 ppm). Chemical shifts for carbons are reported in parts per million downfield from tetramethylsilane and are referenced to the carbon resonances of the solvent peak ( $^{13}\text{C}$  NMR:  $\text{CDCl}_3$  at 77.0 ppm, and  $\text{C}_6\text{H}_6$  at 128.14). NMR data are represented as follows: chemical shift, integration, multiplicity (s = singlet, d = doublet, t = triplet, m = multiplet, brs = broad singlet), coupling constants (Hz). IR spectra were recorded on a Perkin-Elmer 1600 FT IR spectrophotometer, with absorbencies quoted as  $\nu$  in  $\text{cm}^{-1}$ . High resolution mass spectrometry was performed on a Bruker MaXis HD electrospray ionisation quadrupole time-of-flight (ESI-QTOF) mass spectrometer. Melting points were obtained on an OptiMelt MPA100 automated melting point system. Electrochemical analysis was performed on a Metrohm Autolab PGSTAT30 potentiostat or a PalmSens Emstat<sup>3</sup> Blue potentiostat. Analytical thin layer chromatography (TLC) were performed using aluminium-backed plates coated with Alugram® SIL G/UV254 purchased from Macherey-Nagel and visualised by UV light (254 nm). Silica gel column chromatography was carried out using 60 Å, 200-400 mesh particle size silica gel purchased from Sigma-Aldrich.

### Scheme S1 – Synthetic route to probe 1

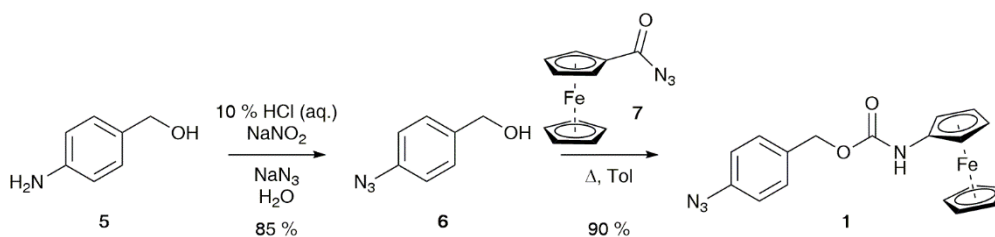

#### 4-azidobenzyl alcohol 6

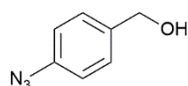

4-aminobenzyl alcohol (319 mg, 2.6 mmol, 1 eq.) was dissolved in HCl (5 M, 1.25 mL) and cooled to 0 °C. A solution of sodium nitrite (207 mg, 3 mmol, 1.15 eq.) in water (5 mL) was added dropwise over 15 mins, after which sodium azide (520 mg, 8 mmol, 3.1 eq.) was added in portionwise over 30 mins. The reaction was stirred for 22 h at room temperature, after which the reaction was poured into sat. NaHCO<sub>3</sub> (20 mL). The aqueous layer was extracted with EtOAc (3 × 10 mL), and the combined organic layers were washed with water (10 mL), brine (10 mL), then dried over MgSO<sub>4</sub> and the solvent was removed *in vacuo*. Purification *via* silica gel column chromatography (EtOAc 1:3 Et<sub>2</sub>O (R<sub>f</sub> = 0.74)) gave the title compound as a yellow oil (329 mg, 85 %).

**Mp**: 29–33 °C (lit. 28.5 °C)

**<sup>1</sup>H NMR** (500 MHz, CDCl<sub>3</sub>); 8.25 – 8.17 (2 H, m), 7.56 – 7.48 (2 H, m), 4.83 (2 H, s).

**<sup>13</sup>C NMR** (126 MHz, CDCl<sub>3</sub>); 148.2, 147.3, 127.0, 123.7, 64.0.

**IR** (film cm<sup>-1</sup>); 3658, 3321, 2981, 2884, 2411, 2255, 2100, 1608, 1581, 1506, 1460, 1419, 1280, 1024, 1010.

#### Ferrocenyl azide 7

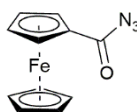

Ferrocenecarboxaldehyde (2.00 g, 8.69 mmol, 1 eq.) was suspended in anhydrous DCM (20 mL) under N<sub>2</sub> and then cooled to 0 °C. Oxalyl chloride (1.49 mL, 17.33 mmol, 2 eq.) was then added dropwise followed by a drop of DMF. The reaction was allowed to warm to room temperature and stirred for 3 h, after which the solvent was removed *in vacuo*. The solid residue was taken up in anhydrous DCM (20 mL) and cooled to 0 °C. Tetrabutylammonium bromide (30 mg, 0.09 mmol, 0.01 eq.) was added followed by sodium azide (0.85 g, 13.07 mmol, 1.5 eq.) in water (4 mL) and the reaction was left to stir for 48 h after which the reaction was diluted with water (50 mL) and the layers separated. The aqueous layer was extracted with DCM (2 × 20 mL) and the combined organic layers were dried over MgSO<sub>4</sub> and the solvent removed *in vacuo*. Purification *via* silica gel column chromatography (Pet. 40–60 °C 1:1 DCM (R<sub>f</sub> = 0.45)) gave the title compound as a red-orange crystalline solid (1.98 g, 89%).

**Mp**: 85–89 °C (lit.<sup>2</sup> 84–86 °C)

**IR** (solid cm<sup>-1</sup>); 3108, 3079, 2148, 1670, 1453, 1372, 1206, 1184, 1054.

**<sup>1</sup>H NMR** (500 MHz, C<sub>6</sub>D<sub>6</sub>); 4.74 (2 H, t, *J* 2.0), 4.02 (2 H, t, *J* 2.0), 3.91 (5 H, s).

**<sup>13</sup>C NMR** (126 MHz, C<sub>6</sub>D<sub>6</sub>); 176.9, 73.3, 71.3, 71.0.

#### 4-azidobenzyl (ferrocenyl)carbamate 1

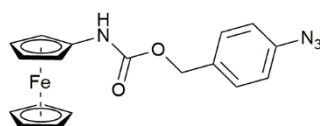

Ferrocenoyl azide (225 mg, 0.88 mmol, 1 eq.) was suspended in anhydrous toluene (2 mL) under argon. A solution of 4-azidobenzyl alcohol (149 mg, 1 mmol, 1.4 eq.) in anhydrous toluene (2 mL) was added and the reaction was refluxed for 2 h, after which the reaction was allowed to cool to room temperature. The solvent was *in vacuo* and purification *via* silica column chromatography (Pet. 40–60 °C 9:1 EtOAc (R<sub>f</sub> = 0.22)) to give the title compound as an orange oil (298 mg, 90 %).

**<sup>1</sup>H NMR** (500 MHz, CDCl<sub>3</sub>); 7.35 (2 H, d, *J* 8.0), 7.03 (2 H, d, *J* 8.0), 5.49 (1 H, brs), 5.18 – 4.68 (3 H, m), 4.41 (7 H, brs).

**<sup>13</sup>C NMR** (126 MHz, CDCl<sub>3</sub>); 140.2, 133.1, 130.0, 119.3, 69.5, 66.4, 64.8, 60.9.

**HRMS** (ESI); calc'd for C<sub>18</sub>H<sub>16</sub>FeN<sub>4</sub>NaO<sub>2</sub> [M+Na]<sup>+</sup>: *m/z* 399.052, found 399.058.

**IR** (solid cm<sup>-1</sup>); 3223, 3094, 2411, 2256, 2112, 2074, 1702, 1507.

#### Aminoferrocene 4

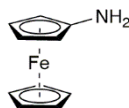

2-(trimethylsilyl)ethyl ferrocenecarbamate (1.04 g, 3 mmol, 1 eq.) was dissolved in tetrabutylammonium fluoride (TBAF) solution [1M in THF] (12 mL, 12 mmol, 4 eq.) and the reaction mixture was heated to 50 °C for 2 hours. After allowing to cool to room temperature, the reaction mixture was concentrated under reduced pressure and the residue was quenched with water (20 mL), then extracted with CH<sub>2</sub>Cl<sub>2</sub> (3 × 20 mL). The combined organics were dried over MgSO<sub>4</sub> and concentrated under reduced pressure to afford the crude product. Purification by silica gel column chromatography (hexane 8:2 EtOAc, *R<sub>f</sub>* = 0.20) gave the title compound as an orange crystalline solid (0.51 g, 85%).

**Mp:** 149-152 °C (lit.<sup>3</sup> 151-153 °C)

**<sup>1</sup>H NMR** (500 MHz, CDCl<sub>3</sub>); 4.11 (5 H, s), 4.01 (2 H, s), 3.86 (2 H, s), 2.56 (2 H, brs).

**<sup>13</sup>C NMR** (126 MHz, CDCl<sub>3</sub>); 68.9, 63.4, 58.7.

### Solution Stability of Probe 1

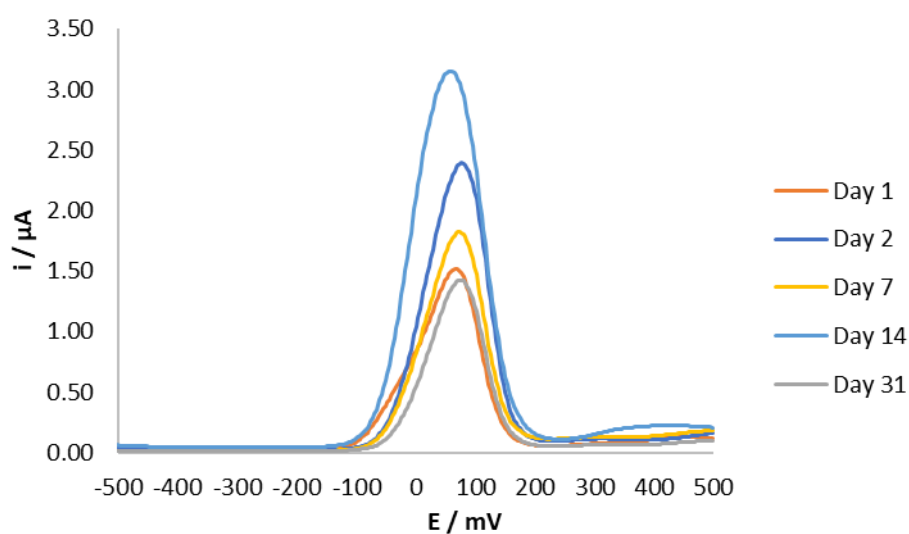

Figure S1 – Differential pulse voltammogram obtained for probe **1** (1 mM) in MeCN:Tris buffer (pH 9, 50 mM) 7.5:92.5. Note: the variance in signal is caused by the variance in surface area of the screen-printed electrodes. No aminoferrocene **4** ( $E_{\text{ox}} = -220\text{mV}$  vs Ag/AgCl) was observed.

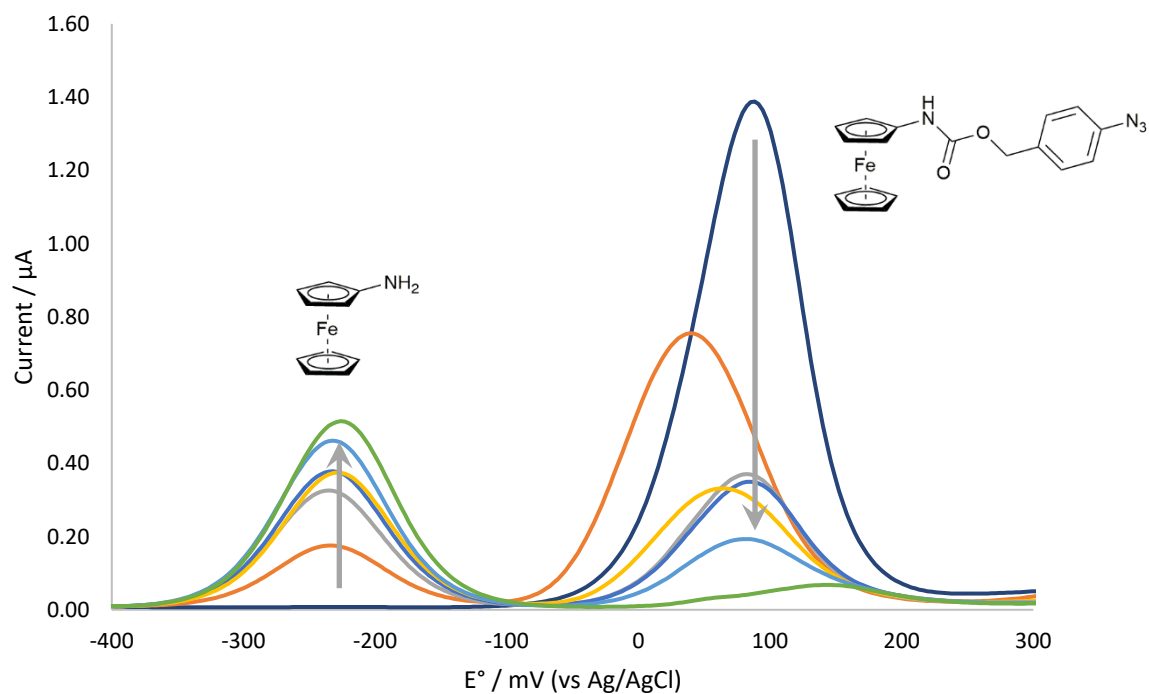

Figure S2 – Differential pulse voltammogram (DPV) overlays of individual duplex voltammograms using different ratios of probe **1** and aminoferrocene **4**. Total ferrocene concentration = 1 mM.

### Assay Optimization

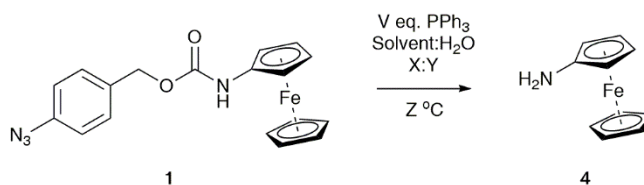

| Exp. | Solvent     | Solvent:Water Ratio | Temperature (°C) | PPh <sub>3</sub> Eq. | Conversion (%) <sup>a</sup> |
|------|-------------|---------------------|------------------|----------------------|-----------------------------|
| 1    | DMF         | 1:1                 | R.T.             | 10                   | 37                          |
| 2    | DMSO        | 1:1                 | R.T.             | 10                   | 16                          |
| 3    | Acetone     | 1:1                 | R.T.             | 10                   | 48                          |
| 4    | MeCN        | 1:1                 | R.T.             | 10                   | 79                          |
| 5    | THF         | 1:1                 | R.T.             | 10                   | 34                          |
| 6    | 1,4-dioxane | 1:1                 | R.T.             | 10                   | 78                          |
| 7    | MeCN        | 3:1                 | R.T.             | 10                   | 78                          |
| 8    | MeCN        | 1:3                 | R.T.             | 10                   | 33 <sup>b</sup>             |
| 9    | MeCN        | 3:1                 | R.T.             | 5                    | 43                          |
| 10   | MeCN        | 3:1                 | 30               | 5                    | 64                          |
| 11   | MeCN        | 3:1                 | 30               | 5                    | 79                          |
| 12   | MeCN        | 3:1                 | 30               | 5                    | 88                          |

Table S1 – Reaction conditions: Probe **1** (1 mM), triphenylphosphine (V eq.), solvent:water X:Y (1 mL), Z °C (a) conversion determined from DPV after 60 minutes. (b) heterogeneous solution prevented accurate sampling.

### Method for the desktop electrochemical detection of organophosphorus(III) compounds (optimized conditions)

A 10 mM stock solution of probe **1** (4 mg) was prepared in acetonitrile (1 mL). A 10 mM stock solution of organophosphorus(III) compound was prepared in acetonitrile (1 mL). To 250 µL of water and 550 µL of acetonitrile in a small screw top vial equipped with a small magnetic stirrer was added 100 µL of the stock solution of **1** then 100 µL of stock solution of organophosphorus(III) compound. The vial was then placed in a DrySyn® block warmed to 50 °C and stirred. Every 3 minutes for 60 minutes thereafter, a 10 µL sample was diluted in 90 µL tris buffer (pH 9, 50 mM), shaken well, and a 20 µL sample was subjected to desktop electrochemical analysis.

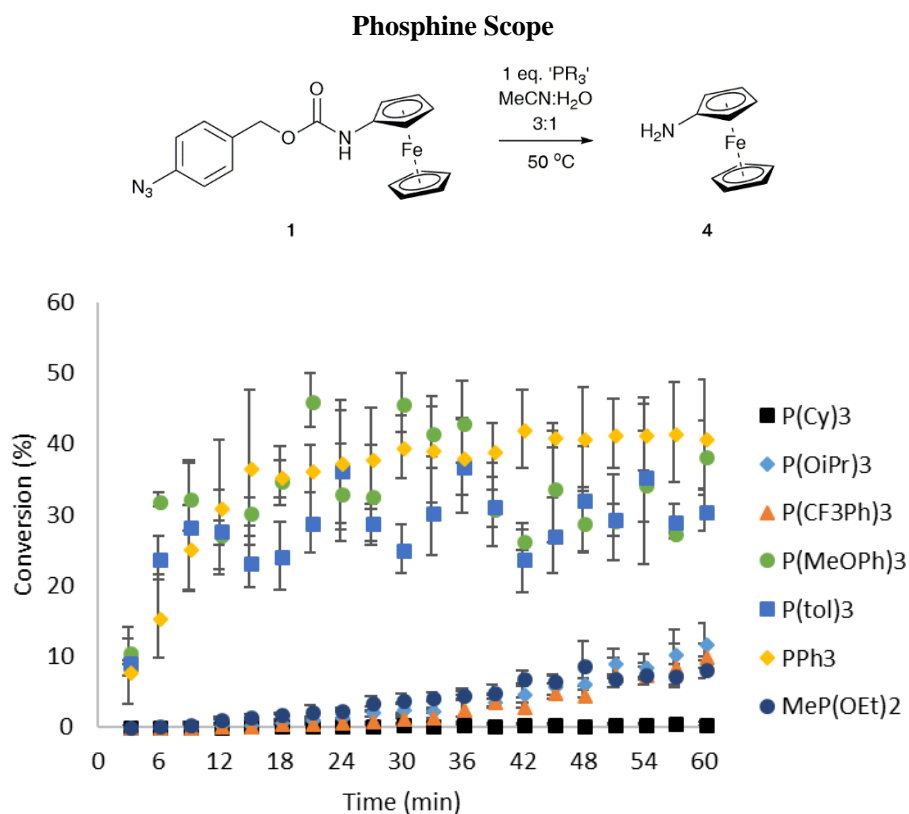

Figure S3 – Conversion of probe **1** (1 mM) to aminoferrocene **4** after addition of  $\text{PR}_3$  (1 mM) in acetonitrile:water (3:1, 1 mL) at 50 °C. Error bars represent the standard deviation where  $n = 3$ .

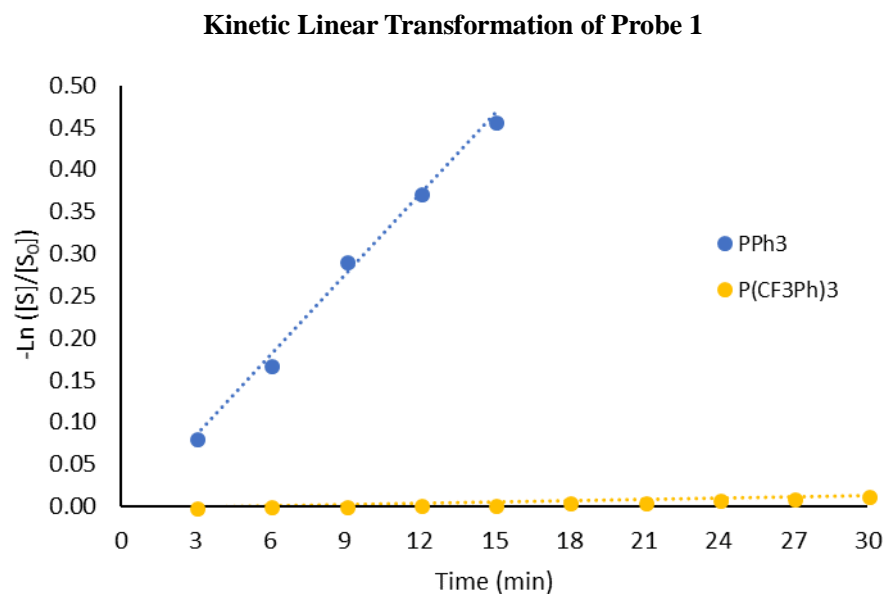

Figure S4 – Kinetic linear transformation of probe **1** (1 mM) to aminoferrocene **4** after addition of  $\text{PR}_3$  (1 mM) in acetonitrile:water (3:1, 1 mL) at 50 °C.

#### Kinetic Calculations

Pseudo-first order equation  $y = kx + C$  where: for  $\text{PPh}_3$   $k = 0.0318 \text{ min}^{-1}$  ( $5.30 \times 10^{-4} \text{ s}^{-1}$ ),  $C = -0.0166$ ; for  $\text{P}(p\text{-CF}_3\text{Ph})_3$   $k = 0.0005 \text{ min}^{-1}$  ( $8.33 \times 10^{-6} \text{ s}^{-1}$ ),  $C = -0.0026$ .



### Complex Sample Testing

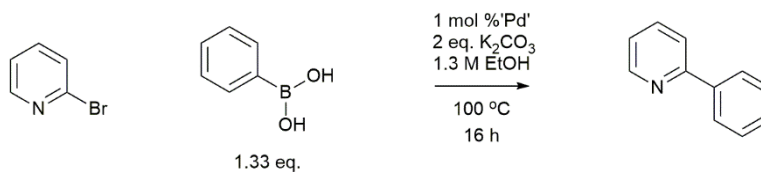

### Complex Sample Preparation

A 1 M stock solution with reference to 2-phenylpyridine was prepared from the crude Suzuki-Miyaura cross-coupling product in acetonitrile. Stock solutions were prepared from:

1. Unpurified 2-phenylpyridine, catalyst  $Pd(PPh_3)_4$ .
2. Purified 2-phenylpyridine, catalyst  $Pd(PPh_3)_4$ .
3. Unpurified 2-phenylpyridine, catalyst  $Pd(dba)_2$ .
4. Purified 2-phenylpyridine, catalyst  $Pd(dba)_2$ .

A 100  $\mu$ L aliquot was analysed using the general desktop electrochemical detection assay.

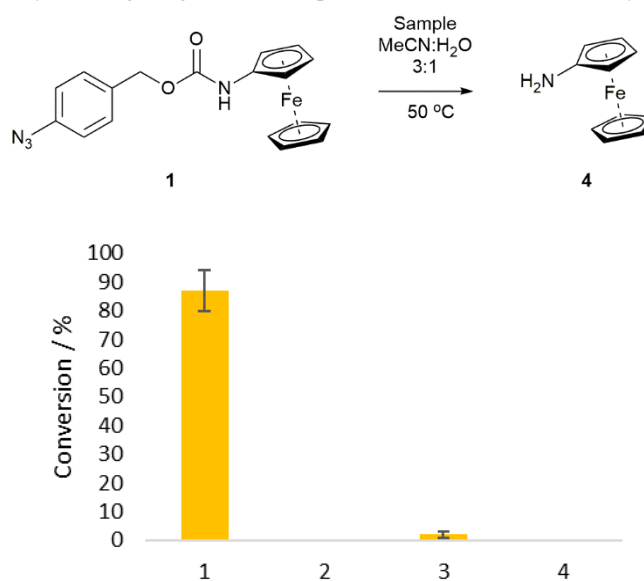

Figure S5 - Conversion of probe **1** (1 mM) to aminoferrocene **4** after addition of complex sample in acetonitrile:water (3:1, 1 mL) at 50 °C after 60 minutes. Error bars represent the standard deviation where  $n = 3$ . (1) Unpurified 2-phenylpyridine, catalyst  $Pd(PPh_3)_4$ ; (2) Purified 2-phenylpyridine, catalyst  $Pd(PPh_3)_4$ ; (3) Unpurified 2-phenylpyridine, catalyst  $Pd(dba)_2$ ; (4) Purified 2-phenylpyridine, catalyst  $Pd(dba)_2$ .

## Handheld Potentiostat

### Handheld Setup

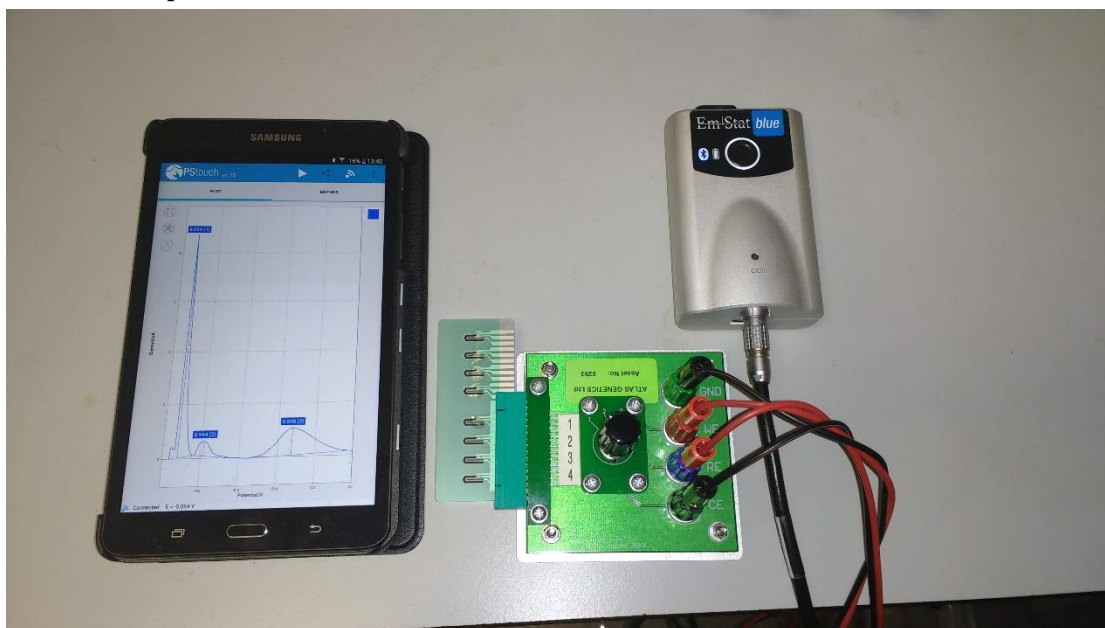

Figure S6 – Photograph of handheld potentiostat setup. PalmSens EmStat<sup>3</sup> Blue potentiostat (right) connected to electrode rig (middle), and *via* Bluetooth to a tablet (left) running PS Touch.

### Method for the handheld electrochemical detection of organophosphorus(III) compounds (optimised conditions)

A 50 mM stock solution of probe **1** (19 mg) was prepared in acetonitrile (1 mL). A 50 mM stock solution of organophosphorus(III) compound was prepared in acetonitrile (1 mL). To 250  $\mu$ L of water and 350  $\mu$ L of acetonitrile in a small screw top vial equipped with a small magnetic stirrer was added 200  $\mu$ L of the stock solution of **1** then 200  $\mu$ L of stock solution of organophosphorus(III) compound. The vial was then placed in a DrySyn® block warmed to 50 °C and stirred. Every 3 minutes for 60 minutes thereafter, a 10  $\mu$ L sample was diluted in 90  $\mu$ L tris buffer (pH 9, 50 mM), shaken well, and a 20  $\mu$ L sample was subjected to handheld electrochemical analysis.

### Calibration Curve

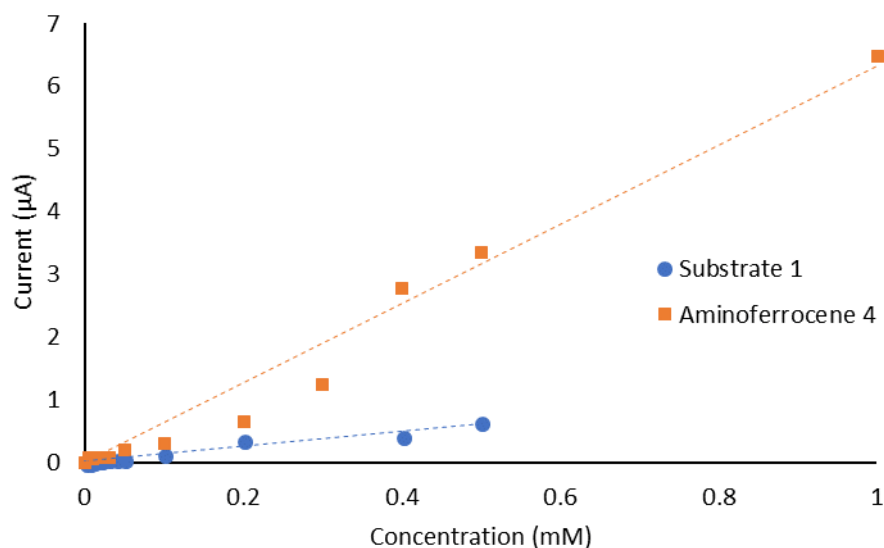

Figure S7 – Calibration curve for probe **1** and aminoferrocene **4** in MeCN:Tris buffer (pH 9, 50 mM) 7.5:92.5.

### Triphenylphosphine assay using Handheld Potentiostat

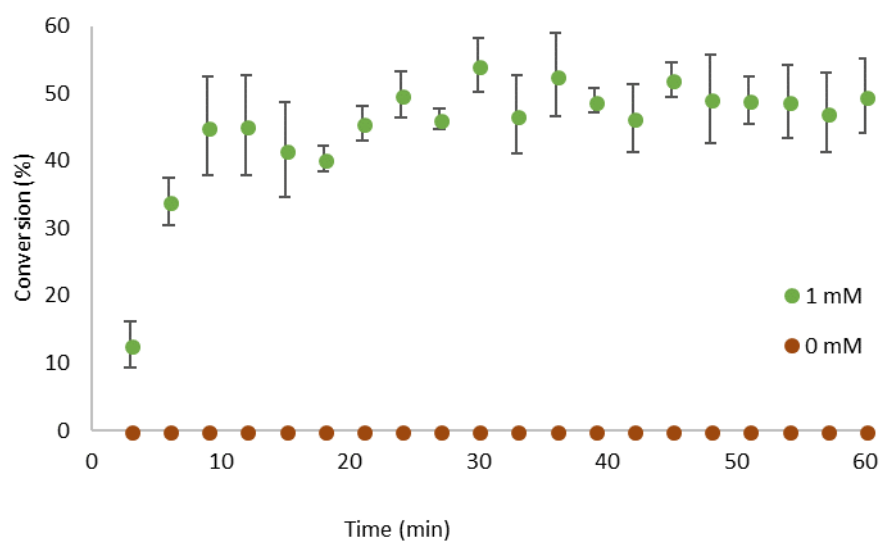

Figure S8 – Conversion of probe **1** (10 mM) to aminoferrocene after addition of triphenylphosphine (X mM) in acetonitrile:water (3:1, 1 mL) at 50 °C. Error bars represent the standard deviation where n = 3.

### Comparative assays for Handheld vs Desktop Electrochemical Analysis

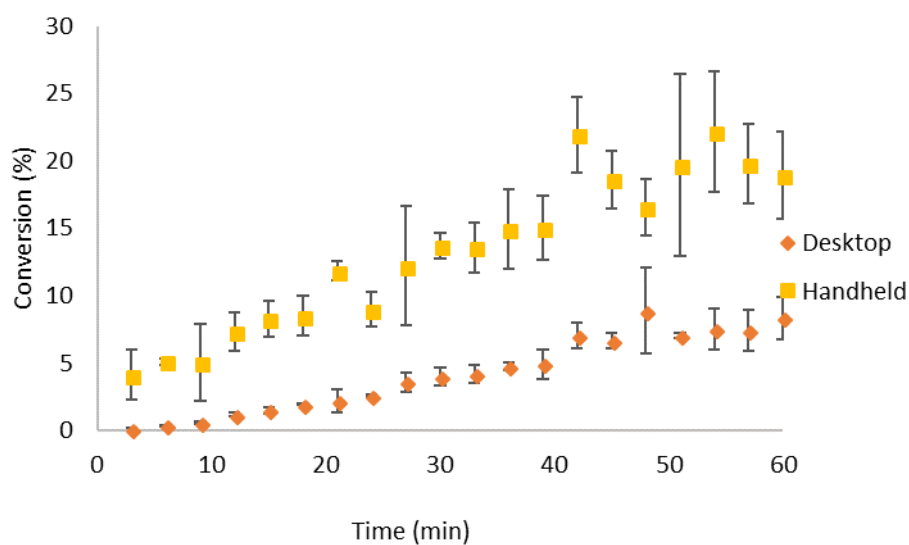

Figure S9 – Conversion of probe **1** (10 mM) to aminoferrocene after addition of diethylmethylphosphinite (1 mM) in acetonitrile:water (3:1, 1 mL) at 50 °C. Error bars represent the standard deviation where n = 3.

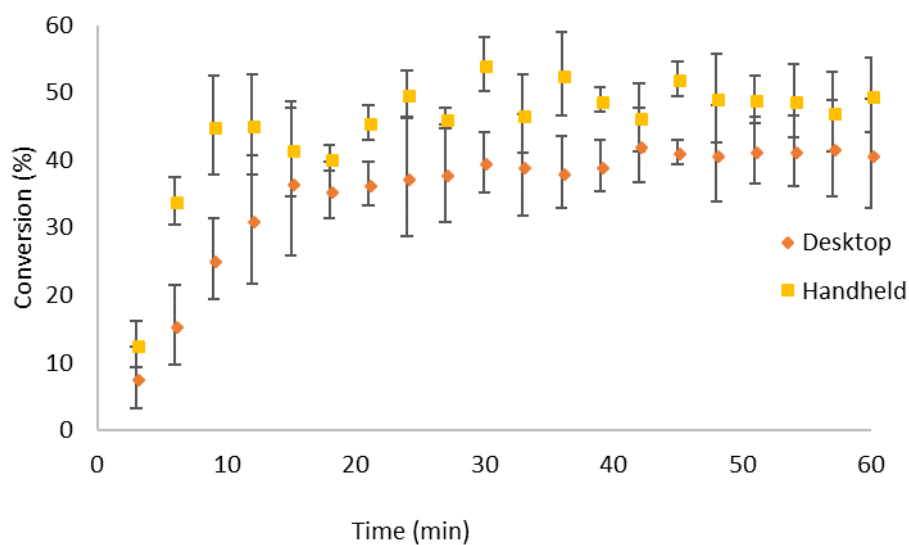

Figure S10 – Conversion of probe **1** (10 mM) to aminoferrocene after addition of triphenylphosphine (1 mM) in acetonitrile:water (3:1, 1 mL) at 50 °C. Error bars represent the standard deviation where n = 3.

PROTON\_01

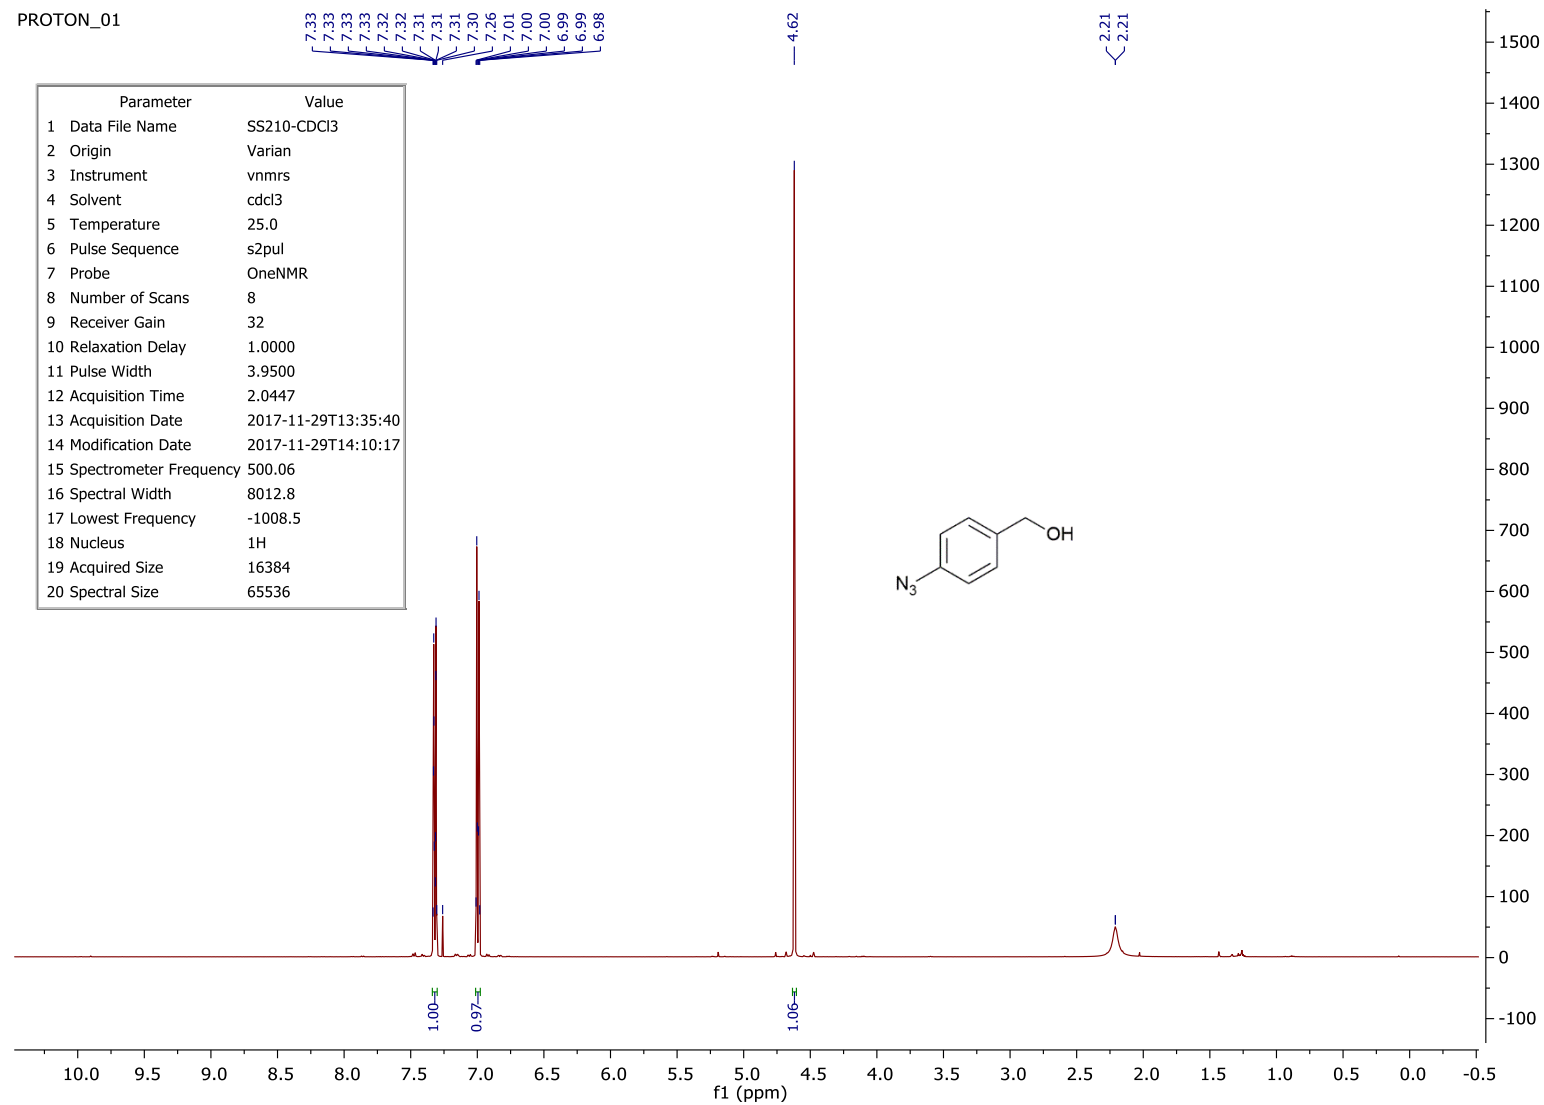

CARBON\_01

| Parameter                 | Value               |
|---------------------------|---------------------|
| 1 Data File Name          | SS210-CDCl3         |
| 2 Origin                  | Varian              |
| 3 Instrument              | vnmrs               |
| 4 Solvent                 | cdcl3               |
| 5 Temperature             | 25.0                |
| 6 Pulse Sequence          | s2pul               |
| 7 Probe                   | OneNMR              |
| 8 Number of Scans         | 128                 |
| 9 Receiver Gain           | 30                  |
| 10 Relaxation Delay       | 1.0000              |
| 11 Pulse Width            | 5.0000              |
| 12 Acquisition Time       | 1.0486              |
| 13 Acquisition Date       | 2017-11-29T13:39:00 |
| 14 Modification Date      | 2017-11-29T14:10:14 |
| 15 Spectrometer Frequency | 125.75              |
| 16 Spectral Width         | 31250.0             |
| 17 Lowest Frequency       | -1781.0             |
| 18 Nucleus                | 13C                 |
| 19 Acquired Size          | 32768               |
| 20 Spectral Size          | 65536               |

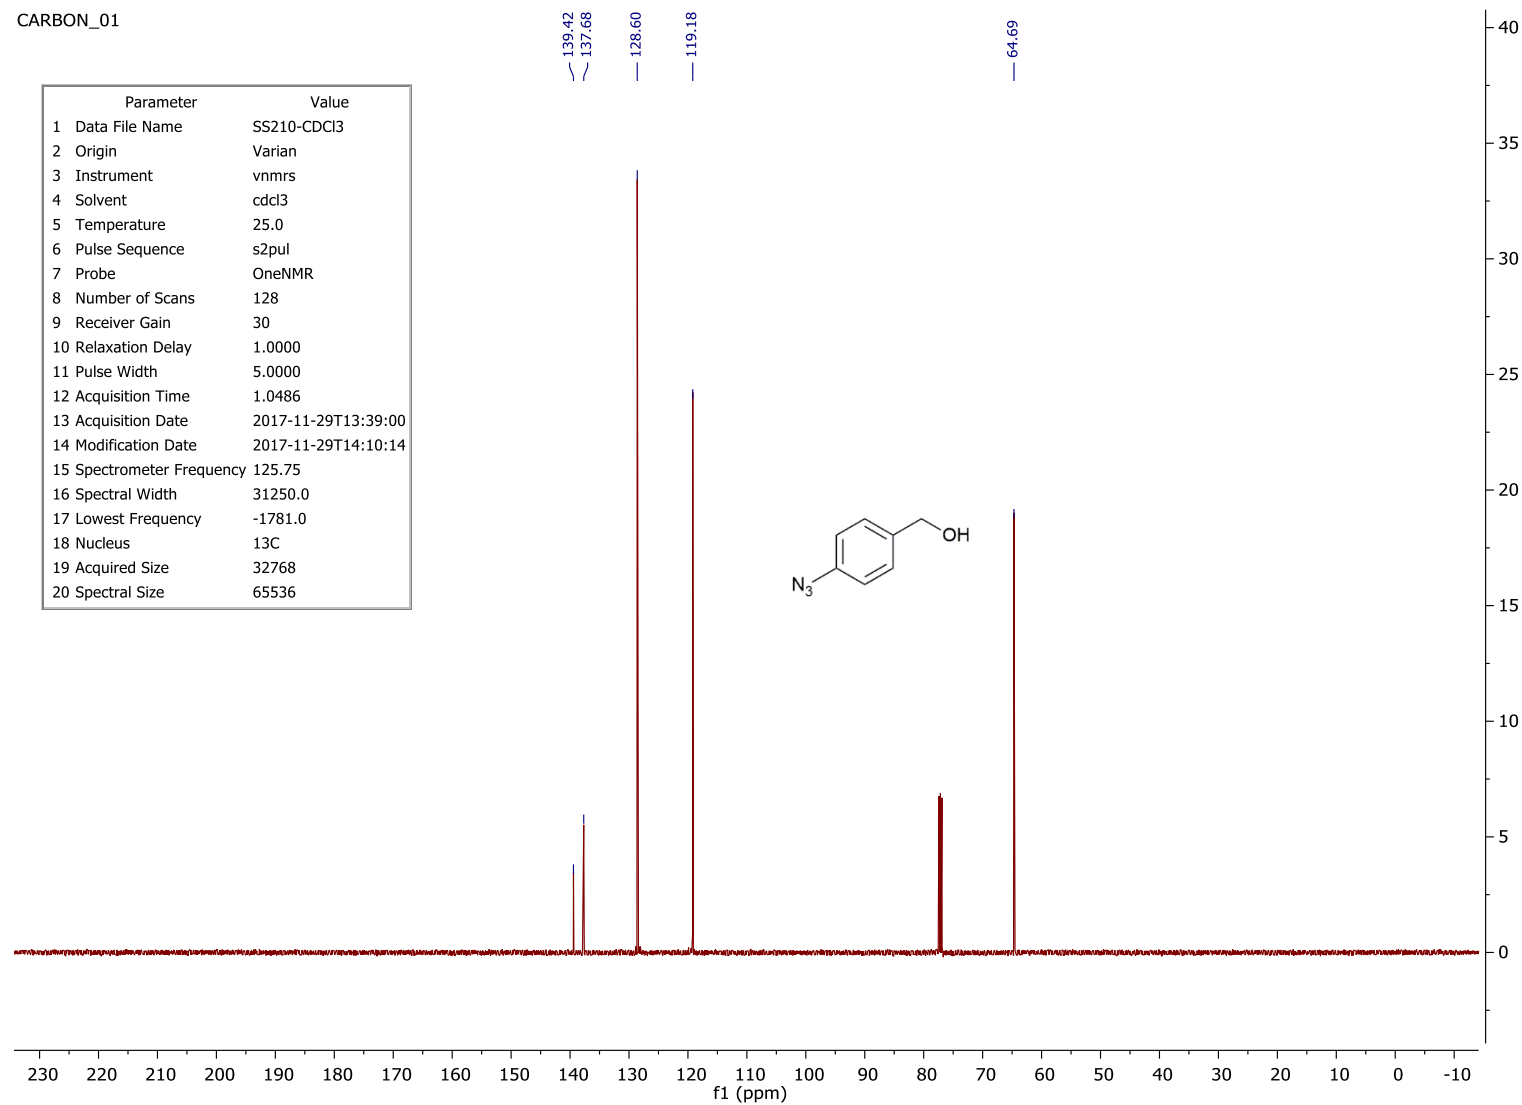

PROTON\_01

| Parameter                 | Value               |
|---------------------------|---------------------|
| 1 Data File Name          | SS100-C6D6          |
| 2 Origin                  | Varian              |
| 3 Instrument              | vnmrs               |
| 4 Solvent                 | c6d6                |
| 5 Temperature             | 25.0                |
| 6 Pulse Sequence          | s2pul               |
| 7 Probe                   | OneNMR              |
| 8 Number of Scans         | 8                   |
| 9 Receiver Gain           | 36                  |
| 10 Relaxation Delay       | 1.0000              |
| 11 Pulse Width            | 3.9500              |
| 12 Acquisition Time       | 2.0447              |
| 13 Acquisition Date       | 2017-06-15T10:42:01 |
| 14 Modification Date      | 2017-06-15T11:53:47 |
| 15 Spectrometer Frequency | 500.06              |
| 16 Spectral Width         | 8012.8              |
| 17 Lowest Frequency       | -1024.1             |
| 18 Nucleus                | 1H                  |
| 19 Acquired Size          | 16384               |
| 20 Spectral Size          | 65536               |

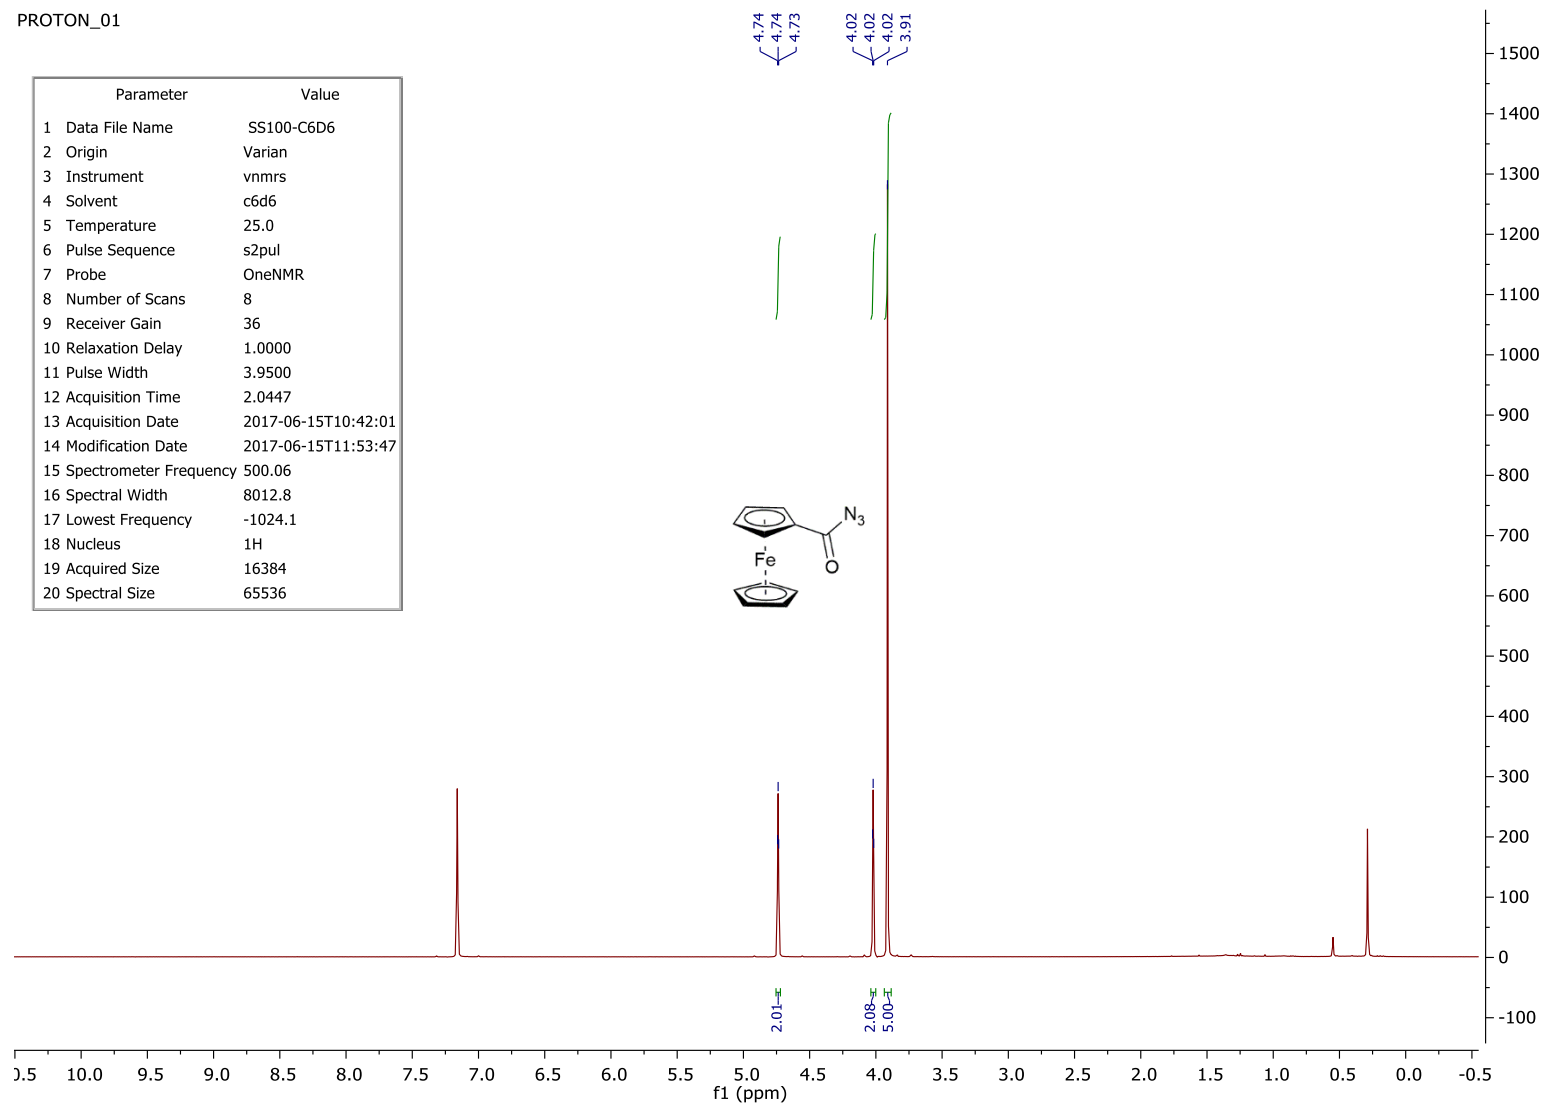

CARBON\_01

| Parameter                 | Value               |
|---------------------------|---------------------|
| 1 Data File Name          | SS100-C6D6          |
| 2 Origin                  | Varian              |
| 3 Instrument              | vnmrs               |
| 4 Solvent                 | c6d6                |
| 5 Temperature             | 25.0                |
| 6 Pulse Sequence          | s2pul               |
| 7 Probe                   | OneNMR              |
| 8 Number of Scans         | 128                 |
| 9 Receiver Gain           | 30                  |
| 10 Relaxation Delay       | 1.0000              |
| 11 Pulse Width            | 4.8750              |
| 12 Acquisition Time       | 1.0486              |
| 13 Acquisition Date       | 2017-06-15T15:42:51 |
| 14 Modification Date      | 2017-06-16T09:09:42 |
| 15 Spectrometer Frequency | 125.75              |
| 16 Spectral Width         | 31250.0             |
| 17 Lowest Frequency       | -1684.4             |
| 18 Nucleus                | <sup>13</sup> C     |
| 19 Acquired Size          | 32768               |
| 20 Spectral Size          | 65536               |

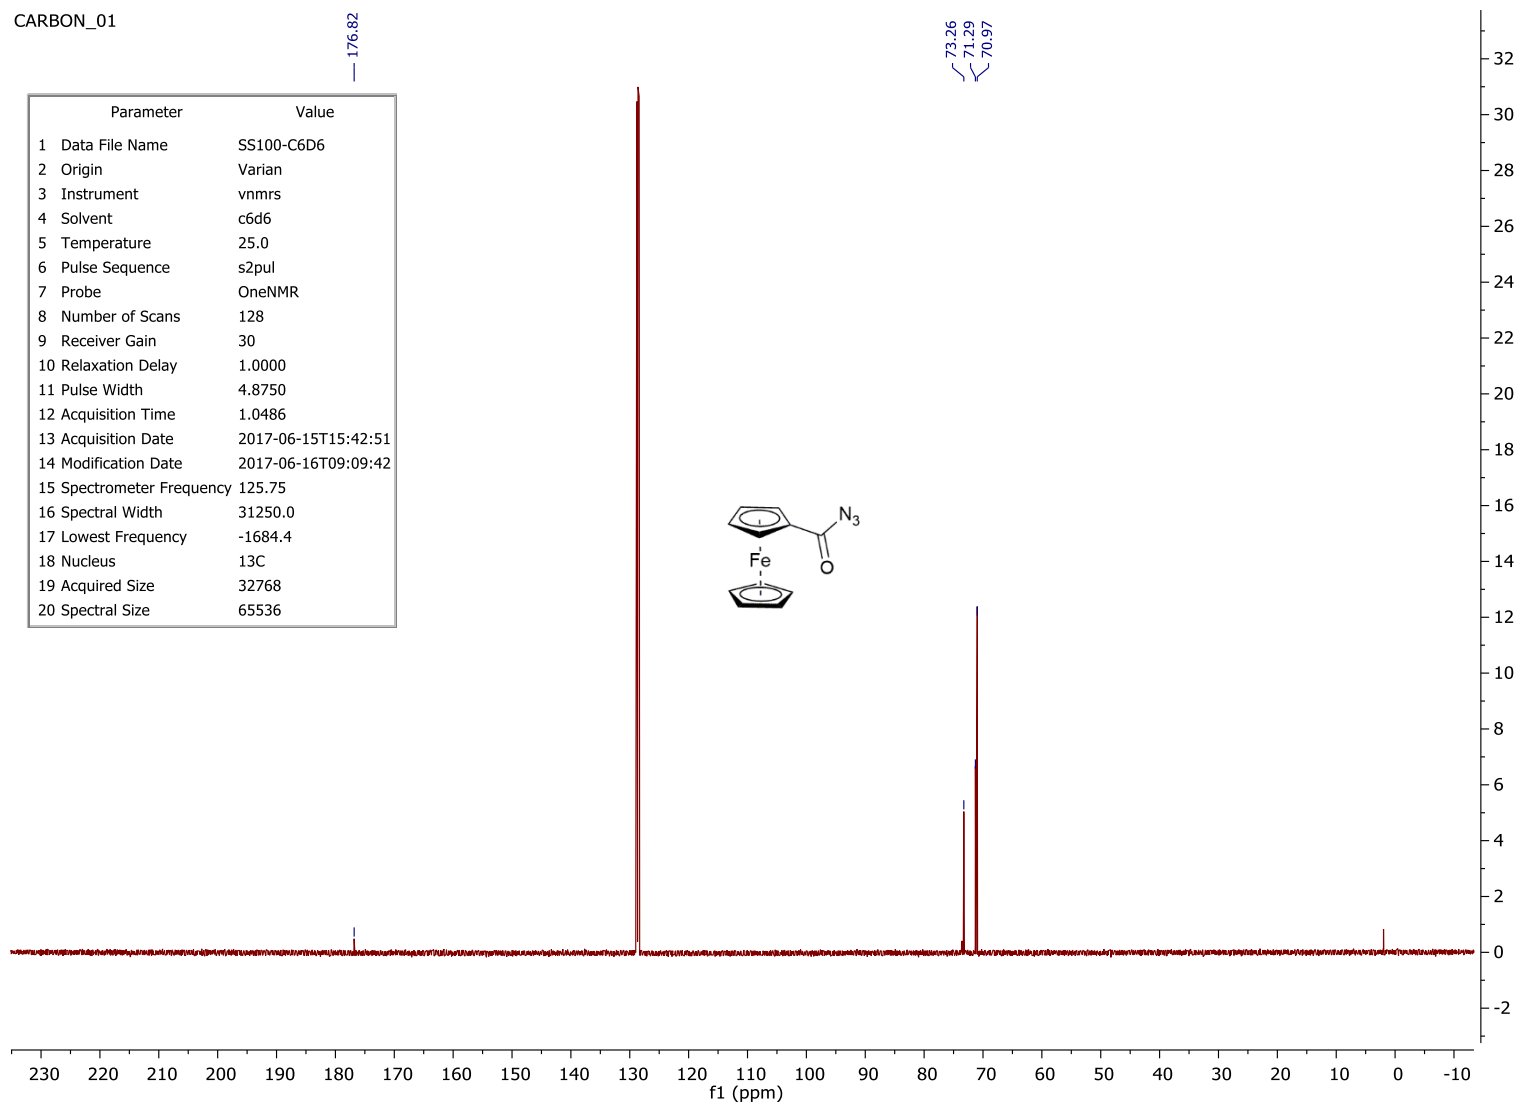



PROTON\_01

| Parameter                 | Value               |
|---------------------------|---------------------|
| 1 Data File Name          | SS296-CDCl3         |
| 2 Origin                  | Varian              |
| 3 Instrument              | vnmrs               |
| 4 Solvent                 | cdcl3               |
| 5 Temperature             | 25.0                |
| 6 Pulse Sequence          | s2pul               |
| 7 Probe                   | OneNMR              |
| 8 Number of Scans         | 8                   |
| 9 Receiver Gain           | 48                  |
| 10 Relaxation Delay       | 1.0000              |
| 11 Pulse Width            | 3.7000              |
| 12 Acquisition Time       | 2.0447              |
| 13 Acquisition Date       | 2018-05-10T13:09:44 |
| 14 Modification Date      | 2018-05-10T13:16:55 |
| 15 Spectrometer Frequency | 500.06              |
| 16 Spectral Width         | 8012.8              |
| 17 Lowest Frequency       | -1009.6             |
| 18 Nucleus                | 1H                  |
| 19 Acquired Size          | 16384               |
| 20 Spectral Size          | 65536               |

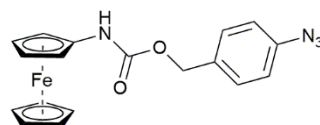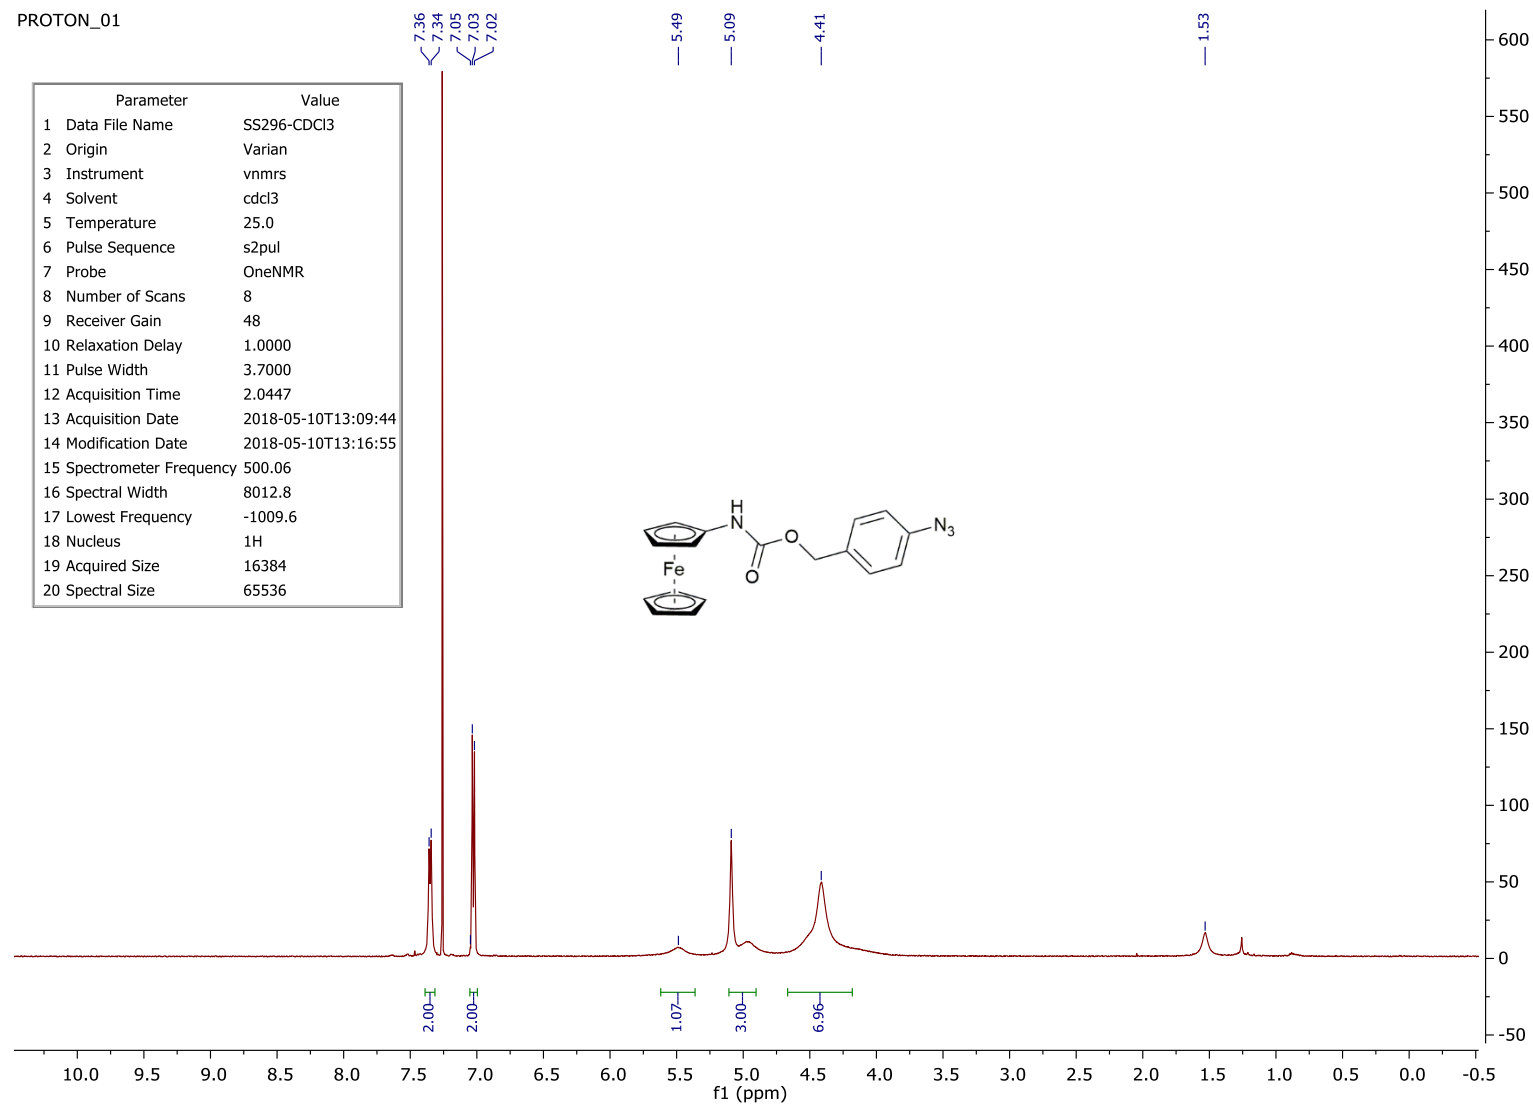

CARBON\_01

| Parameter                 | Value               |
|---------------------------|---------------------|
| 1 Data File Name          | SS212-CDCl3         |
| 2 Origin                  | Varian              |
| 3 Instrument              | vnmr5               |
| 4 Solvent                 | cdcl3               |
| 5 Temperature             | 25.0                |
| 6 Pulse Sequence          | s2pul               |
| 7 Probe                   | OneNMR              |
| 8 Number of Scans         | 128                 |
| 9 Receiver Gain           | 30                  |
| 10 Relaxation Delay       | 1.0000              |
| 11 Pulse Width            | 5.0000              |
| 12 Acquisition Time       | 1.0486              |
| 13 Acquisition Date       | 2017-12-07T17:19:03 |
| 14 Modification Date      | 2017-12-08T08:32:18 |
| 15 Spectrometer Frequency | 125.75              |
| 16 Spectral Width         | 31250.0             |
| 17 Lowest Frequency       | -1780.6             |
| 18 Nucleus                | <sup>13</sup> C     |
| 19 Acquired Size          | 32768               |
| 20 Spectral Size          | 65536               |

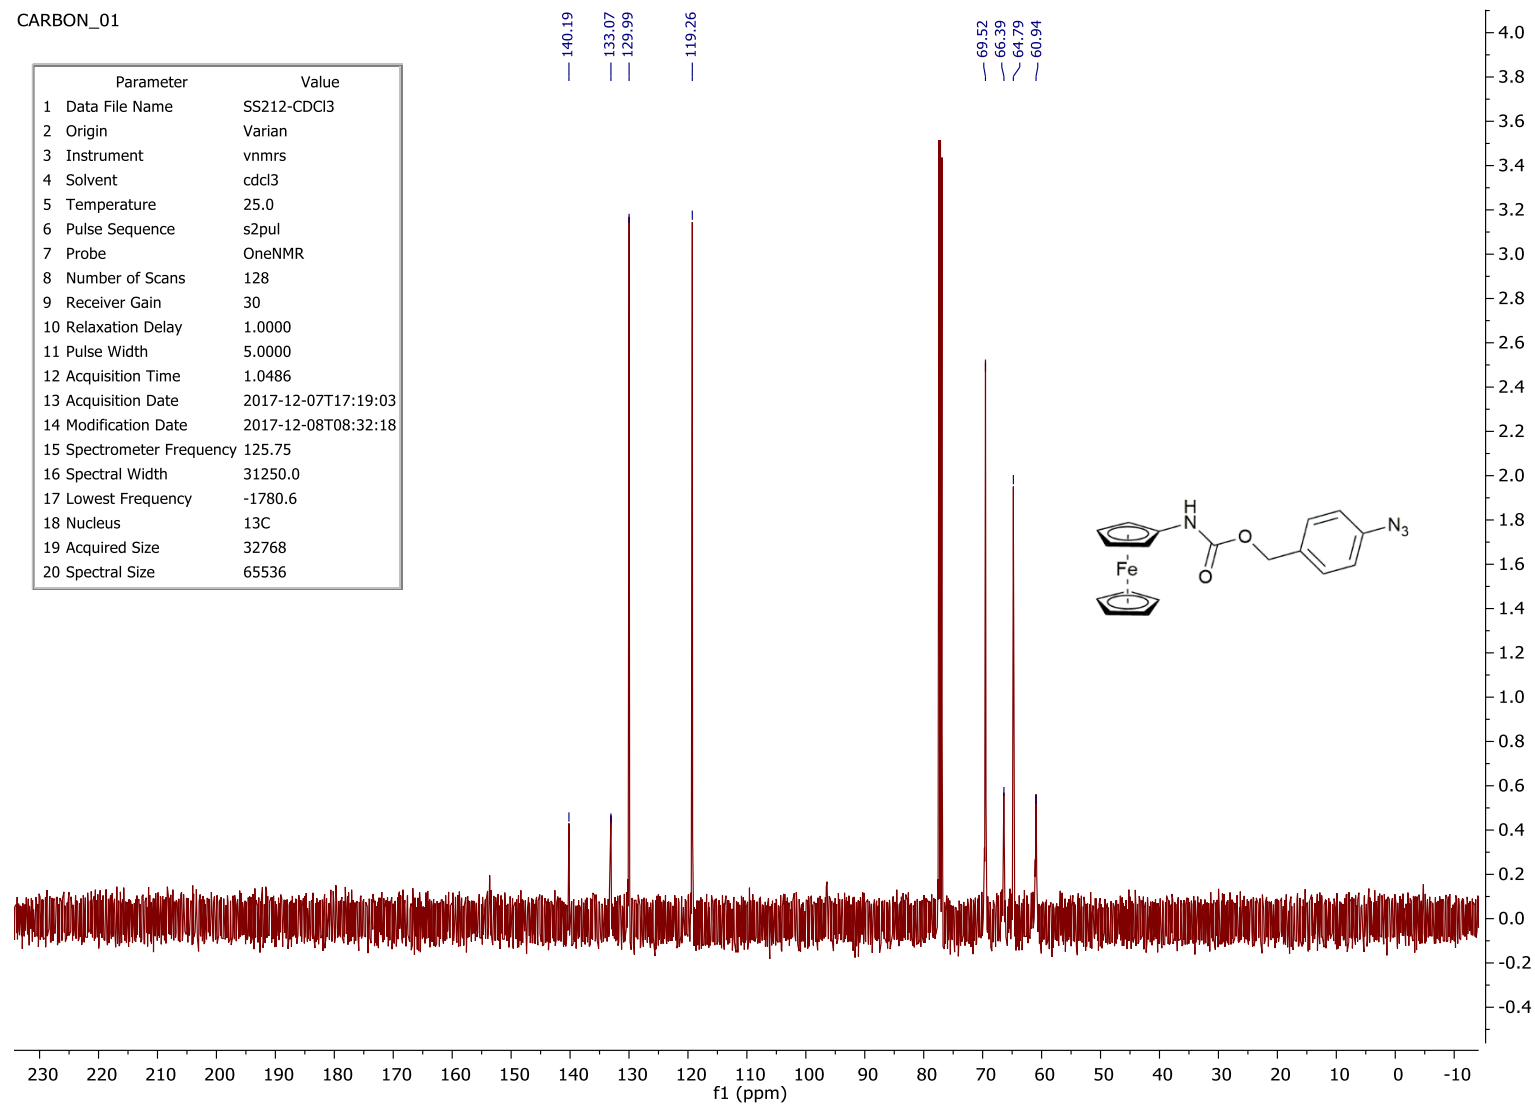

PROTON\_01

| Parameter                 | Value               |
|---------------------------|---------------------|
| 1 Data File Name          | SS098-CDCl3         |
| 2 Origin                  | Varian              |
| 3 Instrument              | vnmr5               |
| 4 Solvent                 | cdcl3               |
| 5 Temperature             | 25.0                |
| 6 Pulse Sequence          | s2pul               |
| 7 Probe                   | OneNMR              |
| 8 Number of Scans         | 8                   |
| 9 Receiver Gain           | 40                  |
| 10 Relaxation Delay       | 1.0000              |
| 11 Pulse Width            | 3.9500              |
| 12 Acquisition Time       | 2.0447              |
| 13 Acquisition Date       | 2017-06-06T09:07:44 |
| 14 Modification Date      | 2017-06-06T09:17:46 |
| 15 Spectrometer Frequency | 500.06              |
| 16 Spectral Width         | 8012.8              |
| 17 Lowest Frequency       | -1000.6             |
| 18 Nucleus                | <sup>1</sup> H      |
| 19 Acquired Size          | 16384               |
| 20 Spectral Size          | 65536               |

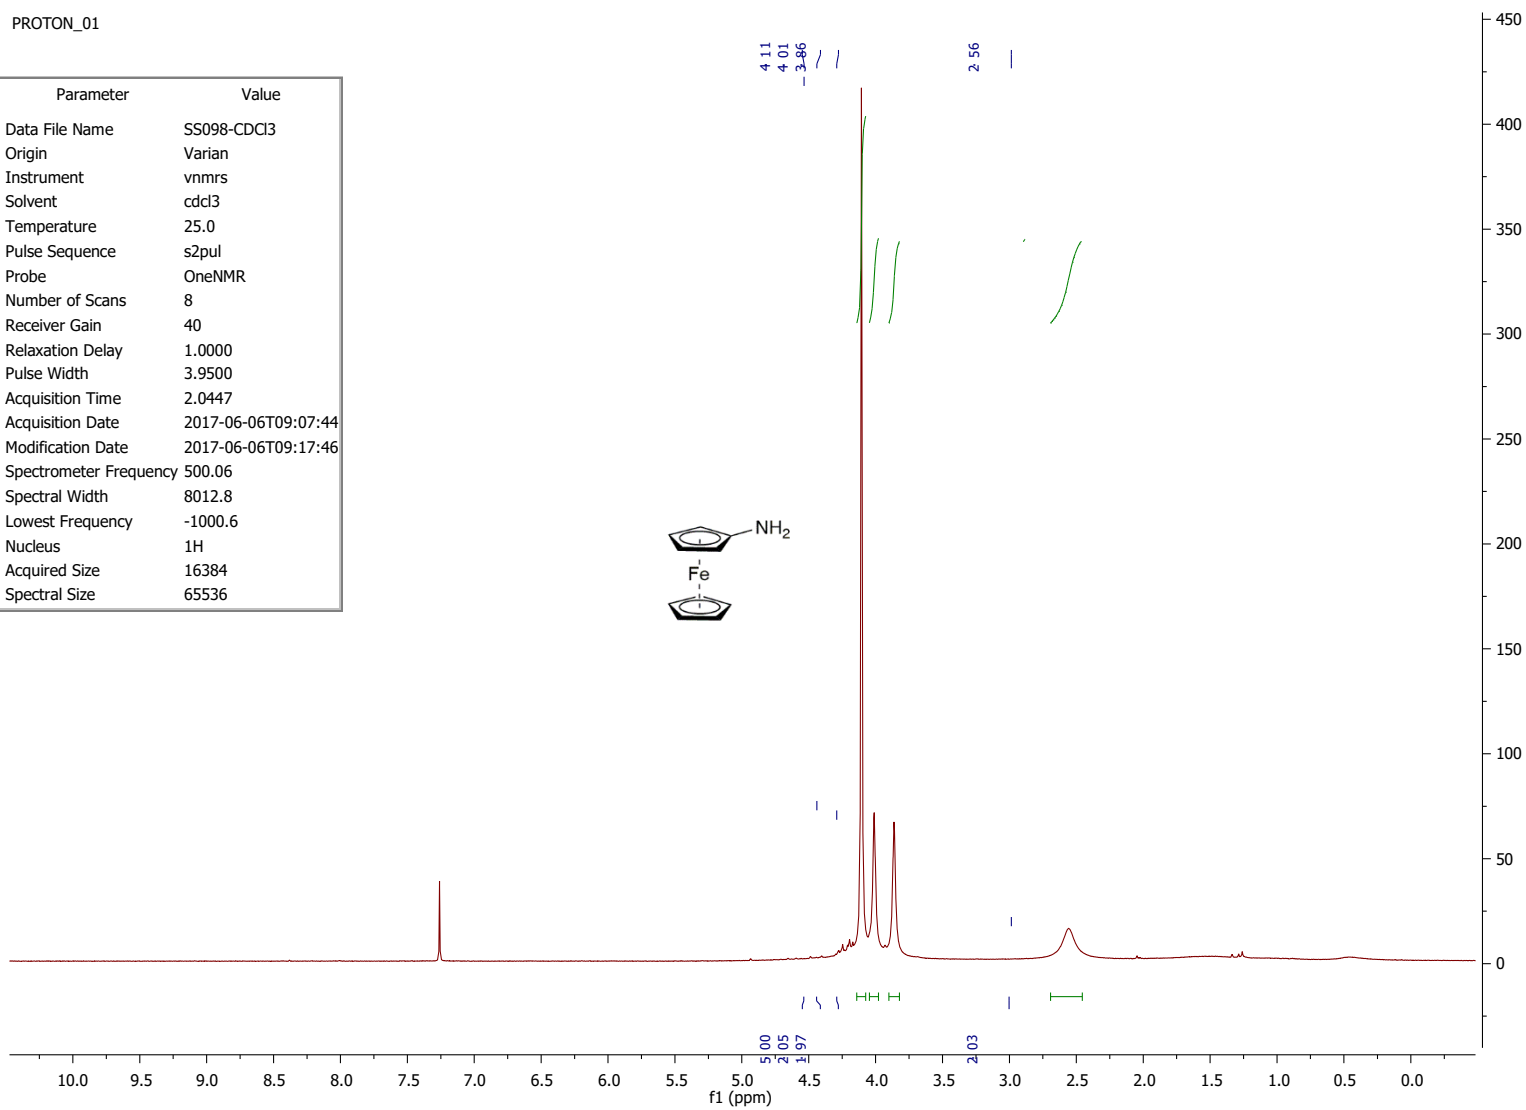

CARBON\_01

| Parameter                 | Value               |
|---------------------------|---------------------|
| 1 Data File Name          | SS098-CDCl3         |
| 2 Origin                  | Varian              |
| 3 Instrument              | vnmrs               |
| 4 Solvent                 | cdcl3               |
| 5 Temperature             | 25.0                |
| 6 Pulse Sequence          | s2pul               |
| 7 Probe                   | OneNMR              |
| 8 Number of Scans         | 128                 |
| 9 Receiver Gain           | 30                  |
| 10 Relaxation Delay       | 1.0000              |
| 11 Pulse Width            | 4.8750              |
| 12 Acquisition Time       | 1.0486              |
| 13 Acquisition Date       | 2017-06-06T10:19:19 |
| 14 Modification Date      | 2017-06-06T10:49:02 |
| 15 Spectrometer Frequency | 125.75              |
| 16 Spectral Width         | 31250.0             |
| 17 Lowest Frequency       | -1793.7             |
| 18 Nucleus                | <sup>13</sup> C     |
| 19 Acquired Size          | 32768               |
| 20 Spectral Size          | 65536               |

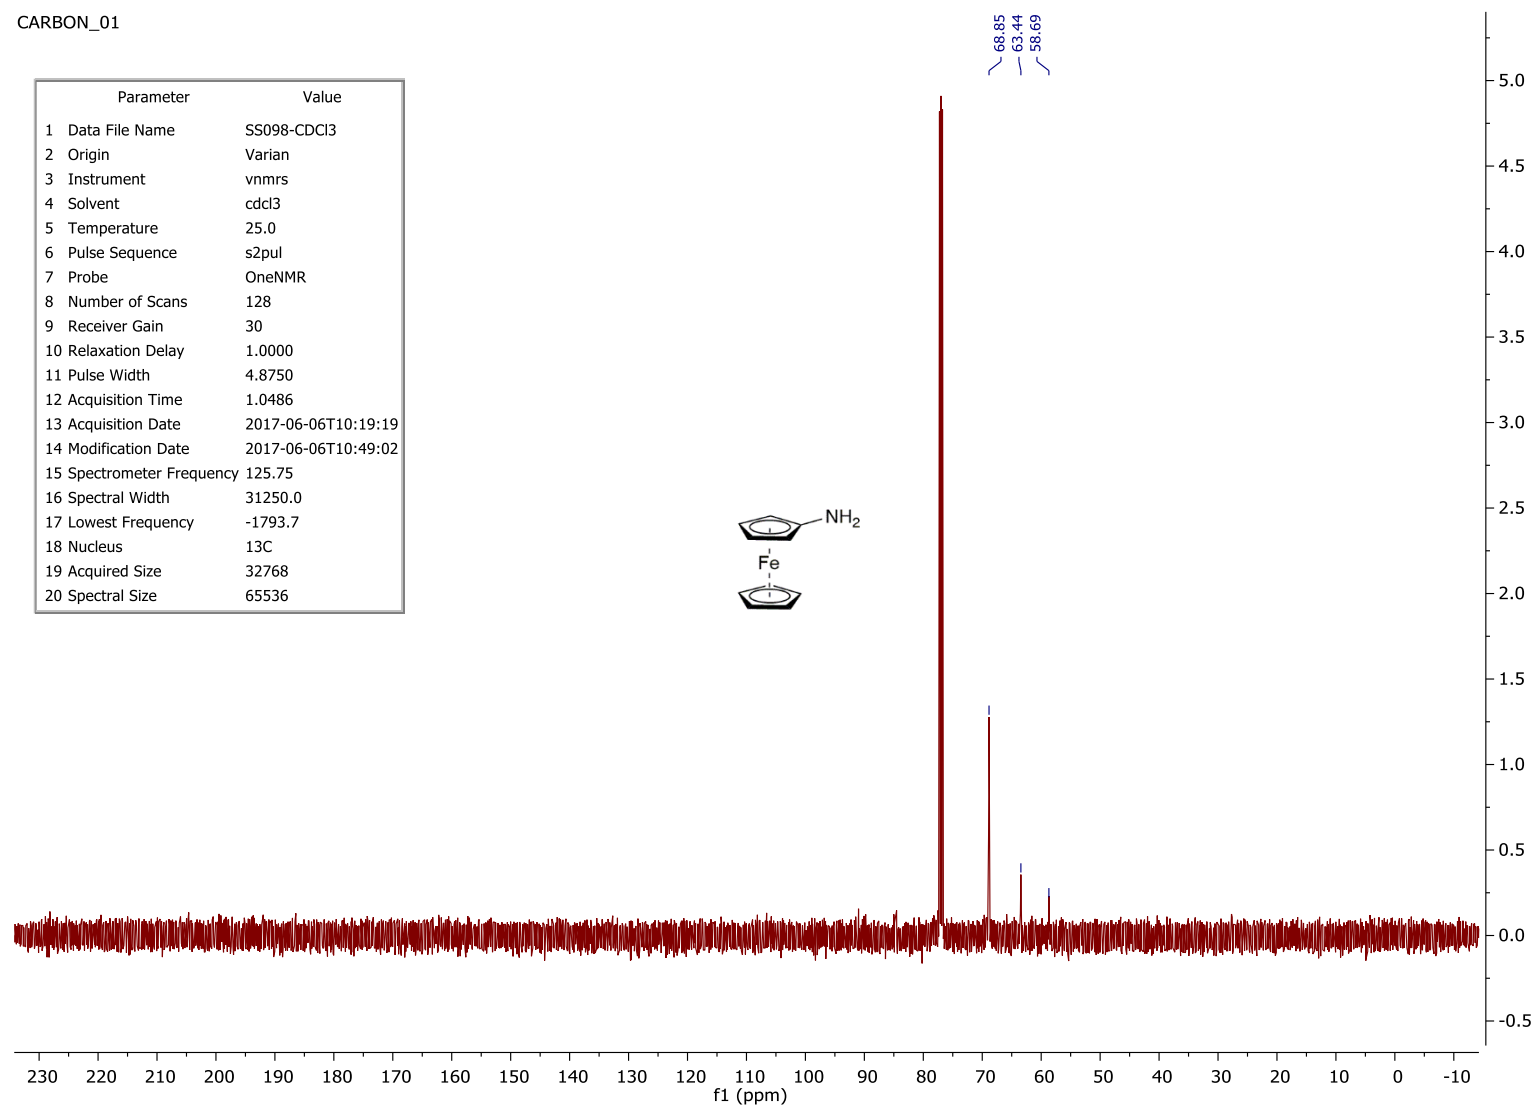

Supplement: s1 [file s1]
